# Supplementary material for: Multiplex SNP detection in multiple codons for accurate drug therapy
Source: Royal Society of Chemistry journal article supplement (doi:10.1039/c4cc06625a), 2014-01-01
Supplement: c4cc06625a1.pdf [file c4cc06625a1.pdf]

# Multiplex SNP Detection in Multiple Codons for Accurate Drug Therapy

Danishmalik Rafiq Sayyed<sup>a</sup>, Satish Balasaheb Nimse<sup>a</sup>, Keum-Soo Song<sup>b</sup>, Nackmoon Sung,<sup>c</sup> Taisun Kim<sup>a\*</sup>

<sup>a</sup>Institute for Applied Chemistry and Department of Chemistry, Hallym University, Chuncheon, 200-702, Korea

<sup>b</sup>Biometrix Technology, Inc. 202 BioVenture Plaza, Chuncheon, 200-161, Korea

Fax: +82-33-256-3421

E-mail: [tskim@hallym.ac.kr](mailto:tskim@hallym.ac.kr)

## Supporting Information

|                                                                                         |            |
|-----------------------------------------------------------------------------------------|------------|
| <b>1. Materials and methods</b>                                                         | <b>S2</b>  |
| <b>2. Composition of different solutions used</b>                                       | <b>S2</b>  |
| <b>3. Probes, target, and Controller DNA sequences</b>                                  | <b>S3</b>  |
| <b>4. Methods and experimental procedures</b>                                           | <b>S5</b>  |
| <b>5. Positions of mutations, respective probes, and controller DNA's</b>               | <b>S9</b>  |
| <b>6. Hybridization and washing method</b>                                              | <b>S10</b> |
| <b>7. Sensitivity of Controller DNA Technology</b>                                      | <b>S12</b> |
| <b>8. Detection and discrimination of the MDR-TB strains in the 24 clinical samples</b> | <b>S13</b> |
| <b>9. Sequencing analysis of 24 clinical samples</b>                                    | <b>S14</b> |
| <b>10. References</b>                                                                   | <b>S26</b> |

## **1. Materials and methods**

All chemicals were purchased from Sigma-Aldrich Chemicals, Korea. All oligonucleotides were purchased from Bioneer, Korea. The PCR pre-mix and DNA extraction kits were obtained from the Bioneer, Korea. All washing solvents for the substrates are of HPLC grade from SK Chemicals, Korea. Ultrapure water (18 M  $\Omega$ /cm) was obtained from a Milli-Q purification system (Millipore). The samples of drug resistant Mycobacterium Tuberculosis (DR-TB) strains were obtained from Dr. Nakmoon Sung of National Institute of Tuberculosis, Masan, South Korea. DNA's were extracted from the clinical samples and stored at -20°C by following the reported method<sup>1</sup>. All DNA chips used in this study were obtained by following the previously reported method.<sup>2</sup>

## **2. Composition of different solutions used for hybridization and washing on MDR-TB 9G DNACHips**

1. Immobilization solution (pH = 7.4): 15% glycerol, 50mM butyl amine, 600mM NH<sub>4</sub>Cl
2. Blocking buffer solution (pH = 7.4): 0.5% milk casein in 4xSSC
3. Hybridization buffer (pH = 7.4): 25% Formamide, 0.1% Triton X-100, 6xSSC
4. Washing buffer solution A (pH = 7.4): 0.1% SDS in 4xSSC
5. Washing buffer solution B (pH = 7.4): 4xSSC

### 3. Probe, Target, and primer oligonucleotide sequences

**Table 1.** Probe and primer sequences

| Probes  | Description                    | Sequences                                            | T <sub>M</sub> (°C) |
|---------|--------------------------------|------------------------------------------------------|---------------------|
| Probe1  | c531WILD                       | 5'-GGGGGGGGG CTTTATCATAAGCGCCGATTGTCGGC -3'          | 51°C                |
| Probe2  | c531M1                         | 5'-GGGGGGGGG CTTTATCAT AAGCGCCGATTGTGGGC -3'         | 51°C                |
| Probe3  | c531M2                         | 5'-GGGGGGGGG CTTTATCATAAGCGCCGATTGTTGGC -3'          | 49°C                |
| Probe4  | c526WILD                       | 5'-GGGGGGGGG CTTTATCAT CGG GGT TGT CCC ACA AG-3'     | 51°C                |
| Probe5  | c526M1                         | 5'-GGGGGGGGG CTTTATCAT CGG GGT TGT CCT ACA AG-3'     | 49°C                |
| Probe6  | c526M2                         | 5'-GGGGGGGGG CTTTATCAT CGG GGT TGT CCA ACA AG-3'     | 49°C                |
| Probe7  | c526M3                         | 5'-GGGGGGGGG CTTTATCAT CGG GGT TGT CCG ACA AG-3'     | 51°C                |
| Probe8  | c526M4                         | 5'-GGGGGGGGG CTTTATCAT CGG GGT TGT CCT GCA AG-3'     | 51°C                |
| Probe9  | c526M5                         | 5'-GGGGGGGGG CTTTATCAT CGG GGT TGT CCC GCA AG-3'     | 53°C                |
| Probe10 | c526M6                         | 5'-GGGGGGGGG CTTTATCAT CGG GGT TGT CCC TCA AG-3'     | 51°C                |
| Probe11 | c522 WILD                      | 5'-GGGGGGGGG CTTTATCAT AAC AAC CCT CTG TCG GG-3'     | 49°C                |
| Probe12 | c522 M1                        | 5'-GGGGGGGGG CTTTATCAT AAC AAC CCT CTG TTG GG-3'     | 47°C                |
| Probe13 | c522 M2                        | 5'-GGGGGGGGG CTTTATCAT AAC AAC CCT CTG CAG GG-3'     | 49°C                |
| Probe14 | c516 WILD                      | 5'-GGGGGGGGG CTTTATCAT GAG CCA ATT CTT GGA CC-3'     | 47°C                |
| Probe15 | c516 M1                        | 5'-GGGGGGGGG CTTTATCAT GAG CCA ATT CTT GGT CC-3'     | 47°C                |
| Probe16 | c516 M2                        | 5'-GGGGGGGGG CTTTATCAT GAG CCA ATT CTT GTA CC-3'     | 45°C                |
| Probe17 | c516 M3                        | 5'-GGGGGGGGG CTTTATCAT GAG CCA ATT CTT TTA CC-3'     | 45°C                |
| Probe18 | c516 M4                        | 5'-GGGGGGGGG CTTTATCAT GAG CCA ATT CTT GGG CC-3'     | 49°C                |
| Probe19 | c511 WILD                      | 5'-GGGGGGGGG CTTTATCAT CGG TAC CAG TCA GCT GA-3'     | 49°C                |
| Probe20 | c511 M1                        | 5'-GGGGGGGGG CTTTATCAT CGG TAC CAG TCA GCC GA-3'     | 51°C                |
| Probe21 | PC                             | 5'-GGG GGG GGG CTT TAT CAT GGC GGT CTG TCA CGT GA-3' | 51°C                |
| Probe22 | PCR                            | 5'-GGG GGG GGG CTT TAT CAT GCG CTG GGG CCC GGC-3'    | 53°C                |
| Probe23 | Cy5-Reverse Primer<br>(Cy5-RP) | 5'-Cy5-TCA CGT GAC AGA CCG CCG GG-3'                 |                     |
| Probe24 | Forward Primer<br>(FP)         | 5'-GTC GCC GCG ATC AAG GAG TTC-3'                    |                     |

PC– probe for the Positive control; PCR– probe for the PCR control; GGGGGGGGG (9G's) for immobilization of the probes on the AMCA slides (Ref. 2a); CTT TAT CAT – vertical spacer group; c511, c516, c522, c526, and c531 – Codon containing mutation; M1-M6 – corresponds to the mutations in the corresponding codons.

**Table 2: Controller DNA (COD) sequences**

| <b>Controller DNA's<br/>corresponding to<br/>codons</b> | <b>Description</b> | <b>Sequence</b> |
|---------------------------------------------------------|--------------------|-----------------|
| <b>c531</b>                                             | <b>531-C</b>       | GCGCCGACTG      |
| <b>c526</b>                                             | <b>526-C</b>       | GGGGTTGACC      |
| <b>c522</b>                                             | <b>522-C</b>       | AGAACAACCC      |
| <b>c516</b>                                             | <b>516-C</b>       | AGCCAATTCAT     |
| <b>c511</b>                                             | <b>511-C</b>       | CGGCACCAGC      |
| <b>PC</b>                                               | <b>PC-C</b>        | CCGGCGGTCTGT    |

## **4. Methods and experimental procedures:**

### **4.1 DNA extraction from Human sputum of TB samples:**

200µl of sputum sample was transferred to a 1.5 mL eppendorf tube and diluted to 500 µL with isopropyl alcohol. The solution was vortexed for 2 min to get homogeneous mixture. The clear solution was transferred to another eppendorf tube. 100 µL of Binding buffer, 20 µL of Proteinase K were added to this solution and mixed. The mixture was incubated in water bath for 20 min at 60°C. Then 400 µL isopropanol was added to the mixture and kept aside for 10 min. The lysate was then carefully transferred into the upper reservoir of the binding column tube (fit in a 2 mL tube) and centrifuged. The Binding column was transferred to a new 2 mL tube for filtration. After addition of the 500 µL of washing buffer the tube was centrifuged (13,000rpm, 3min) to remove washing buffer (W). Then the Binding column tube was transferred to a new 1.5 mL tube for elution. Finally, the DNA was isolated by addition of the 100µl of elution buffer to binding column tube.

### **4.2 Amplification of genomic DNA by PCR:**

#### **4.2.1 Amplification of genomic DNA by PCR to obtain PCR product with 620 base pairs:**

The MTB and MDR-TB genotype samples were amplified by PCR to generate amplicons of approximately 620bp. The extracted DNA was amplified with the single primer set of reverse primer with a sequence 5'-ACGGGTGCACGTCGCGGACCTCCA-3', and forward primer with a sequence 5'-GCTGTTGGACATCTACCGCAAGC-3'. 10 µL of the extracted DNA sample, 10 µL of Cy5-RP (4 pmol/µL), and 10 µL (2 pmol/µL) of FP were added to the PCR premix. Amplification was performed with the following steps: transcriptase denaturation at 95°C for 5 min and then DNA polymerization for 60 cycles at 94°C for 10 s, 60°C for 10 s, and 72°C for 10 s. The concentration of the PCR product was measured by the nanodrop as shown in the **Figure S1**. Then the dilutions were made as shown in the **Table S3** and the copy number in each solution was calculated. The 5 µL of each diluted PCR product was subjected to agarose gel electrophoresis, using a 2% agarose standard run in 1X Tris borate EDTA. 10µL of PCR products after dilution (1copy ~ 10<sup>6</sup> copies) were used were used to produce the 130 base pair Cy5 labeled PCR products.

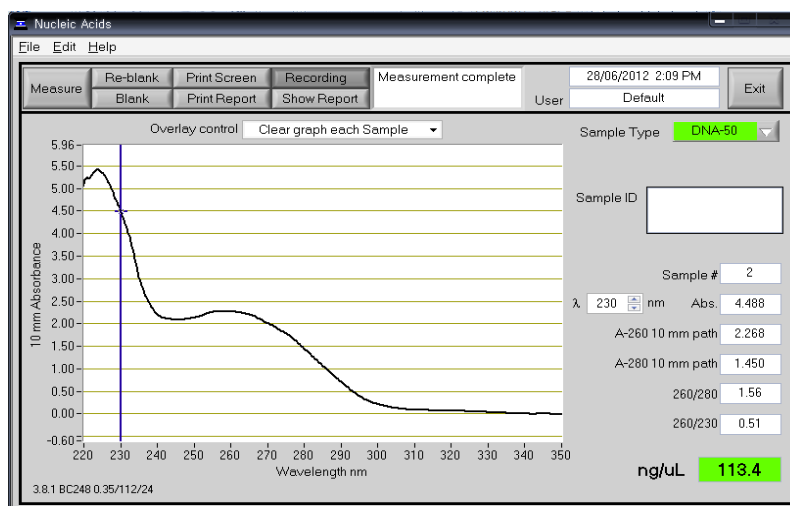

**Figure S1:** Determination of concentration in the final PCR product by using nanodrop

**Table S3:** DNA Concentration and Copy number for the PCR product of the 620 base pairs

| Sr. no. | Initial concentration | Dilution              | Final Concentration | Copy number            |
|---------|-----------------------|-----------------------|---------------------|------------------------|
| 1       | 113ng/μL              | 1μL diluted to 113μL  | 1ng/μL              | 10 <sup>9</sup> copies |
| 2       | 1ng/μL                | 10μL diluted to 100μL | 100pg/μL            | 10 <sup>8</sup> copies |
| 3       | 100pg/μL              | 10μL diluted to 100μL | 10pg/μL             | 10 <sup>7</sup> copies |
| 4       | 10pg/μL               | 10μL diluted to 100μL | 1pg/μL              | 10 <sup>6</sup> copies |
| 5       | 1pg/μL                | 10μL diluted to 100μL | 100fg/μL            | 10 <sup>5</sup> copies |
| 6       | 100fg/μL              | 10μL diluted to 100μL | 10fg/μL             | 10 <sup>4</sup> copies |
| 7       | 10fg/μL               | 10μL diluted to 100μL | 1fg/μL              | 10 <sup>3</sup> copies |
| 8       | 1fg/μL                | 10μL diluted to 100μL | 100ag/μL            | 10 <sup>2</sup> copies |
| 9       | 100ag/μL              | 10μL diluted to 100μL | 10ag/μL             | 10 <sup>1</sup> copies |
| 10      | 10ag/μL               | 10μL diluted to 100μL | 1ag/μL              | 1 copy                 |

Note: Solutions of 1 copy (10ag/μL) to 10<sup>6</sup> copies (10pg/μL) were used for further experiments

#### 4.2.2 Symmetric (1:1 Cy5-RP:FP) and Asymmetric(2:1 Cy5-RP:FP) PCR amplification of genomic DNA to obtain Cy5 labeled PCR product with 130 base pairs:

The MTB and MDR-TB genotype samples were amplified by PCR to generate amplicons of approximately 130bp. The extracted DNA was amplified with the single primer set of primers (**Table S1**). Similar method was followed for the symmetric as well as asymmetric PCR except for the concentrations

of the Cy5-RP and FP. For symmetric PCR, 10  $\mu$ L of the extracted DNA sample, 10  $\mu$ L of Cy5-RP (10pmol/ $\mu$ L), and 10  $\mu$ L (10pmol/ $\mu$ L) of FP were added to the PCR premix. For asymmetric PCR, 10  $\mu$ L of the extracted DNA sample, 10  $\mu$ L of Cy5-RP (20pmol/ $\mu$ L), and 10  $\mu$ L (10pmol/ $\mu$ L) of FP were added to the PCR premix. Amplification was performed with the following steps: transcriptase denaturation at 95°C for 5 min and then DNA polymerization for 60 cycles at 94°C for 10 s, 60°C for 10 s, and 72°C for 10 s. Then 5  $\mu$ L of PCR products were subjected to agarose gel electrophoresis, using a 2% agarose standard run in 1X Tris borate EDTA (**Figure S2**). The PCR was run to increase the concentrations by 10 times of the initial genomic DNA (620 base pairs).

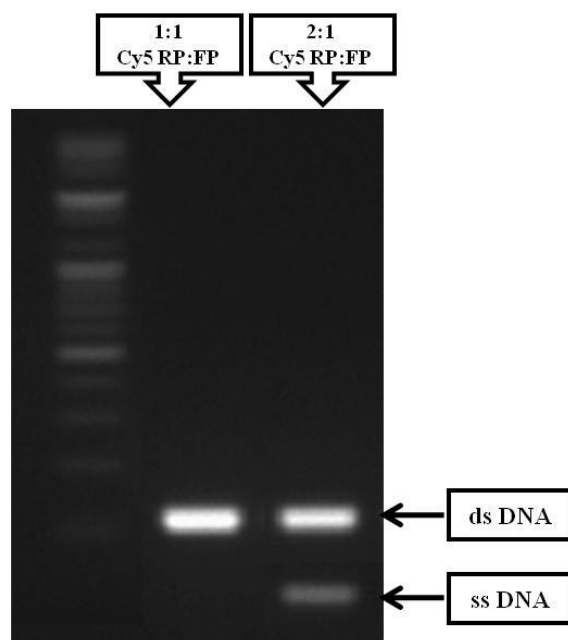

**Figure S2.** Gel electrophoresis images of the PCR products

#### 4.3 Typical method for the preparation of the MDR-TB 9G DNAChip:

The MDR-TB 9G DNAChips were prepared by spotting the immobilization solution containing oligonucleotide probes Probe1-Probe25 on the 9G slides, with the microarrayer as reported earlier.<sup>2</sup>The spots were arranged as demonstrated in the **Scheme S1**. The microarrayed 9G slides were then kept in the incubator (25°C, 50% humidity) for 4h to immobilize the oligonucleotides. The slides were then suspended in the blocking buffer solution at 25°C for 30 min, in order to remove the excess oligonucleotides and to deactivate the non-spotted areas. Then the slides were rinsed with washing buffer solutions A and B for 5min each, and then dried with commercial centrifuge to obtain the MDR-TB 9G DNAChips. Before hybridization, the MDR-TB 9G DNAChips were covered with Secure-Seal™ hybridization chambers.

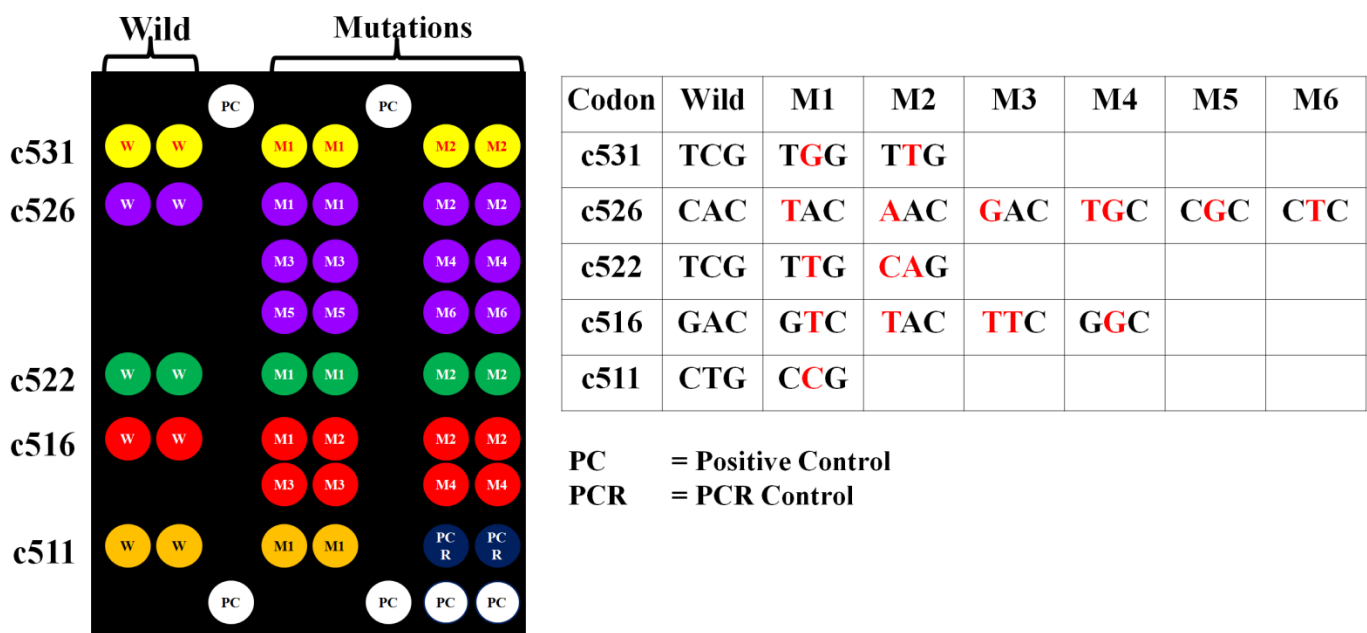

**Scheme S1:** Scheme for immobilization probes to produce MDR-TB 9G DNAChips

## 5. Positions of mutations, respective probes, and controller DNA's

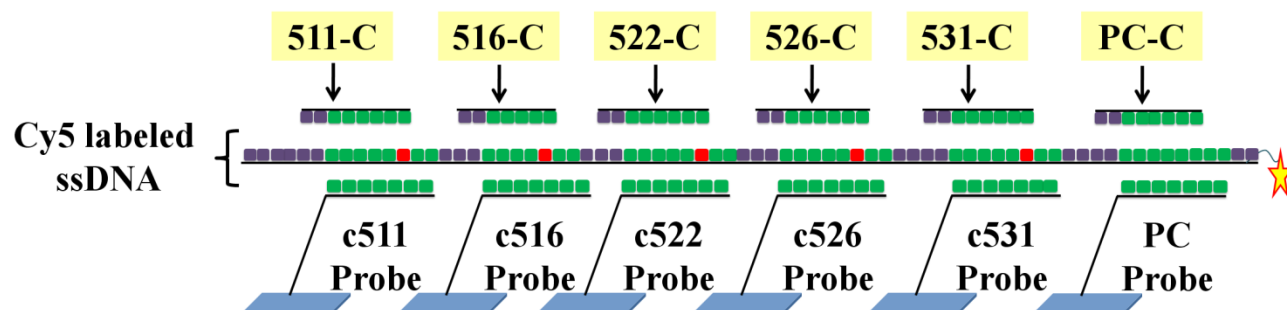

**Scheme S2:** Positions of mutations on the Cy5 ssDNA and binding positions of the corresponding immobilized probes and controller DNA's (mutations are depicted in the red color).

## 6. Hybridization and washing method

### 6.1 Hybridization with the Cy5 Labeled PCR product of TB (in absence of controller DNA's)

Hybridizations were done by using the 100fmol of the Cy5 labeled PCR products of the TB at 25°C for 30min in the commercial incubator. Then MDR-TB 9G DNAChips was rinsed with washing buffer solutions A and B successively for 2 min each at 35°C, in order to remove the excess target DNA, and dried with commercial centrifuge (1000 rpm). The fluorescence signal of the microarray was measured on ScanArrayLite, and the images were analyzed by Quant Array software (Packard Bioscience).

### 6.2 Hybridization of the Cy5 Labeled PCR products of TB, MDR-TB strains (in presence of controller DNA's)

The 100fmol of the Cy5 labeled PCR products of the MTB-DR strains were first mixed with 100 pmol of each of the controller DNA's in the hybridization buffer. Then this mixture was loaded on the MDR-TB 9G DNAChips and allowed to hybridize at 25°C for 30min in the commercial incubator. Then the MDR-TB 9G DNAChips were rinsed with washing buffer solutions A and B successively for 2 min each at 35°C, in order to remove the excess target DNA, and dried with commercial centrifuge (1000 rpm). The fluorescence signals were measured on ScanArrayLite, and the images were analyzed by Quant Array software (Packard Bioscience). The hybridization, washing, and scanning processes are depicted in the Scheme S2.

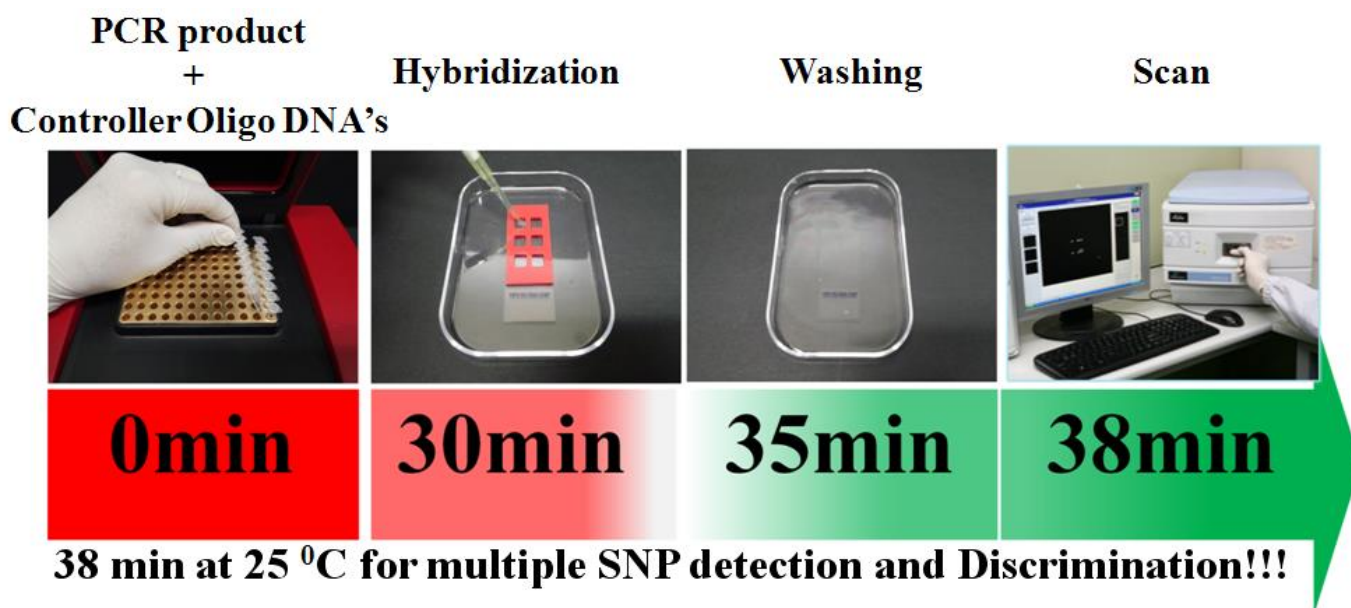

**Scheme S3:** Experimental steps for the multiple SNP detection and discrimination.

### 6.3 Effect of the single stranded Cy5 Labeled PCR product (Cy5 labeled ssDNA) and the double stranded Cy5 Labeled PCR product (Cy5 labeled dsDNA) on the hybridization yield.

For the discrimination of multiple SNP's, the probes immobilized on the MDR-TB 9G DNACHips were allowed to hybridize at 25 °C for 30 min with the 100 fmol of the Cy5 ssDNA of the wild TB strain, the results are depicted in the **Figure S3**. The **Figure S3** demonstrate that, the PCR product obtained by the 1:1 ratio of reverse primer (RP): forward primer (FP) did not show good hybridization ability with the immobilized probes. The probes corresponding to the positive control (PC), codon 511 (c511), and codon 516 (c516) showed target specific hybridizations but with a very low signal intensities (15000 - 36000). However, the probes corresponding to the codon 522 (c522) codon 526 (c526), and codon 531 (c531) did not hybridize with the PCR product at all.

It was understood that the PCR product obtained by the 1:1 ratio of Cy5-RP:FP mainly contain the dsDNA, which do not show good hybridization ability on the microarray **Figure S3 A**. Therefore to generate ample amount of ssDNA, an asymmetric PCR was performed by using 2:1 ratio of Cy5-RP:FP.<sup>3</sup> The PCR product obtained by the asymmetric PCR (2:1 ratio of Cy5-RP:FP) demonstrated improved hybridization ability with the immobilized probes as shown in the **Figure S3 B**. The probes corresponding to the PC, c511, and c516 showed increased intensities (46000 - 65000). Moreover, the probes corresponding to the c522, c526, and c531 also showed hybridization but with a very low signal intensities (4000 - 4800). It is very clear from the **Figure S3 B** that, the probes corresponding to the PC, c511, and c516 bind more strongly than the probes corresponding to the c522, c526, and c531 to the PCR product.

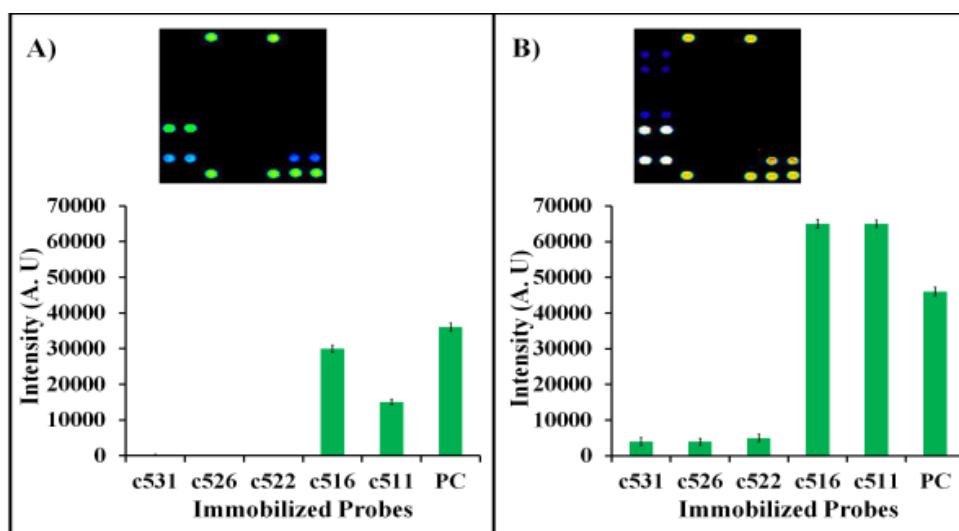

**Fig. S3** Fluorescence image and respective graph after hybridization of immobilized probes with PCR product of wild TB strain obtained by Cy5-RP: FP ratio of A) 1:1 and B) 2:1, PMT gain = 53.

## 7. Sensitivity of Controller DNA Technology

### 7.1 Sensitivity of CDT in the multiple SNP detection of wild and mutant TB strains in the individual sample

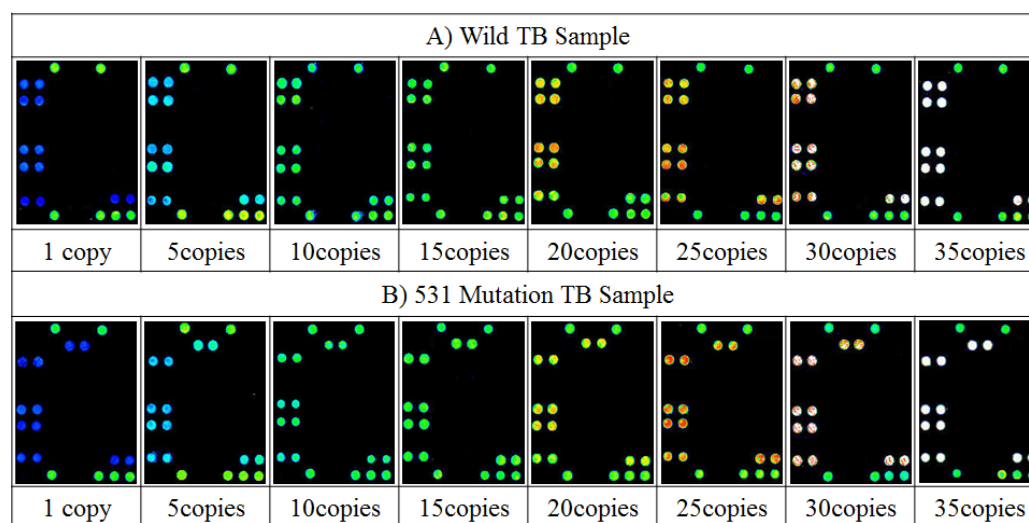

**Figure S4:** A) Determination of sensitivity of CDT by using 1 – 35 copies of genomic DNA of the wild TB strain, B) Determination of sensitivity of CDT by using 1 – 35 copies of genomic DNA of the mutant TB strain (mutation at c531).

### 6.2 Sensitivity of CDT in the multiple SNP detection of wild and mutant TB strains in the mixed sample

| Sensitivity of CDT in the detection and discrimination of Wild and Mutant TB strains in mixed sample |     |     |     |     |     |     |
|------------------------------------------------------------------------------------------------------|-----|-----|-----|-----|-----|-----|
|                                                                                                      |     |     |     |     |     |     |
| Copies of genomic DNA's of wild TB strains                                                           | 100 | 100 | 100 | 100 | 100 | 100 |
| Copies of genomic DNA's of mutant TB strains (mutation at c531)                                      | 100 | 30  | 20  | 10  | 5   | 0   |

**Figure S5:** A) Determination of sensitivity of CDT in the multiple SNP detection of wild and mutant TB strains in the mixed sample (Sample contained 100 copies of genomic DNA of wild TB strain in presence of 0, 5, 10, 20, 30 and 100 copies of the genomic DNA of mutant TB strain (mutation at c531))

## 8. Detection of the MDR-TB strains in the 24 clinical samples

| Sample    | Mutation codon               | Clinical Sample |           |           |           |           |           |
|-----------|------------------------------|-----------------|-----------|-----------|-----------|-----------|-----------|
| Sample-1  | 522 (TCG→TTG)                |                 |           |           |           |           |           |
| Sample-2  | 531(TCG→TTG)                 |                 |           |           |           |           |           |
| Sample-3  | 526(CAC→CGC)                 |                 |           |           |           |           |           |
| Sample-4  | 516(GAC→GTC)                 |                 |           |           |           |           |           |
| Sample-5  | Susceptible                  |                 |           |           |           |           |           |
| Sample-6  | 526(CAC→TGC)                 | Sample-1        | Sample-2  | Sample-3  | Sample-4  | Sample-5  | Sample-6  |
| Sample-7  | 526 (CAC→TAC)                |                 |           |           |           |           |           |
| Sample-8  | 526(CAC→AAC)                 |                 |           |           |           |           |           |
| Sample-9  | 526(CAC→GAC)                 |                 |           |           |           |           |           |
| Sample-10 | Susceptible                  |                 |           |           |           |           |           |
| Sample-11 | 526(CAC→CTC)                 |                 |           |           |           |           |           |
| Sample-12 | 516(CAC→TAC)                 | Sample-7        | Sample-8  | Sample-9  | Sample-10 | Sample-11 | Sample-12 |
| Sample-13 | 516 (GAC→TAC)                |                 |           |           |           |           |           |
| Sample-14 | 516(GAC→TAC)                 |                 |           |           |           |           |           |
| Sample-15 | 516(GAC→TTC)                 |                 |           |           |           |           |           |
| Sample-16 | 511(CTG→CCG)<br>516(GAC→GGC) |                 |           |           |           |           |           |
| Sample-17 | 516(GAC→GGC)                 |                 |           |           |           |           |           |
| Sample-18 | 531(TCG→TGG)                 | Sample-13       | Sample-14 | Sample-15 | Sample-16 | Sample-17 | Sample-18 |
| Sample-19 | 511(CTG→CCG)<br>526(CAC→CAA) |                 |           |           |           |           |           |
| Sample-20 | 522 (TCG→CAG)                |                 |           |           |           |           |           |
| Sample-21 | 511(CTG→CCG)                 |                 |           |           |           |           |           |
| Sample-22 | Susceptible                  |                 |           |           |           |           |           |
| Sample-23 | Susceptible                  |                 |           |           |           |           |           |
| Sample-24 | Susceptible                  | Sample-19       | Sample-20 | Sample-21 | Sample-22 | Sample-23 | Sample-24 |

**Figure S6:** Detection of the multiple mutations in the MDR-TB strains in the clinical samples.

## 9. Sequencing analysis of sample -1 -24

Add the sequencing data with the embedded chip result for the same sample. (24 samples 24 sequencing spectra)

**Sample 1: 522 (TCG→TTG)**

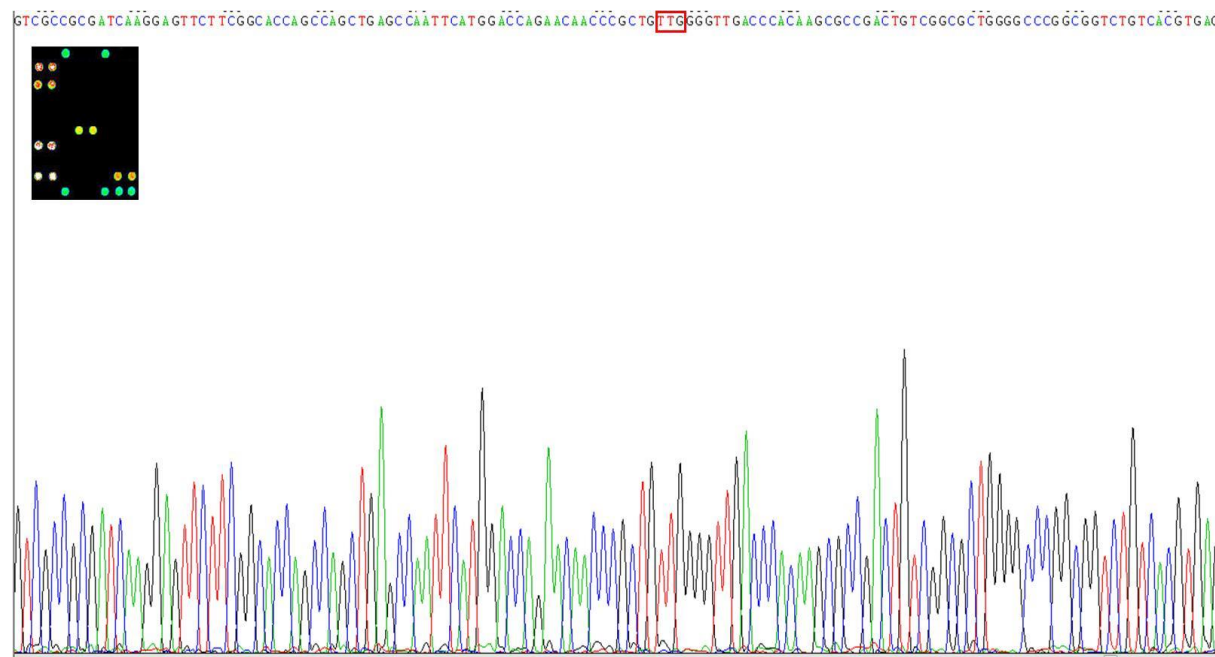

**Figure S7:** Spectra of sequencing analysis embedded with the fluorescence image for Sample1

**Sample 2: 531(TCG→TTG)**

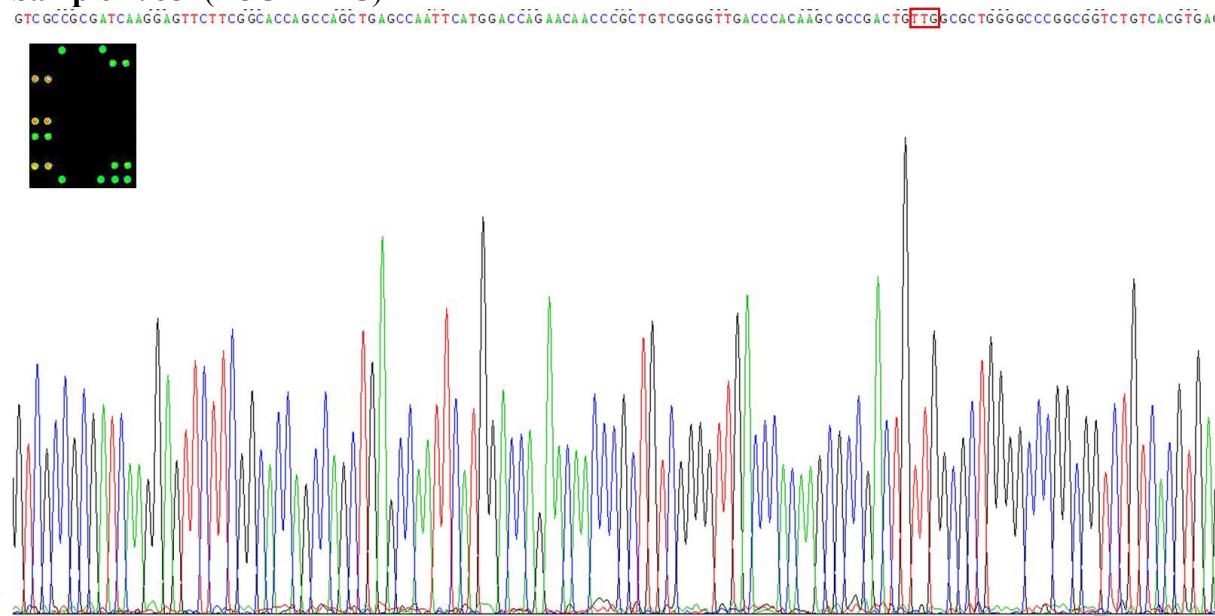

**Figure S8:** Spectra of sequencing analysis embedded with the fluorescence image for Sample2

**Sample 3: 526 (CAC→CGC).**

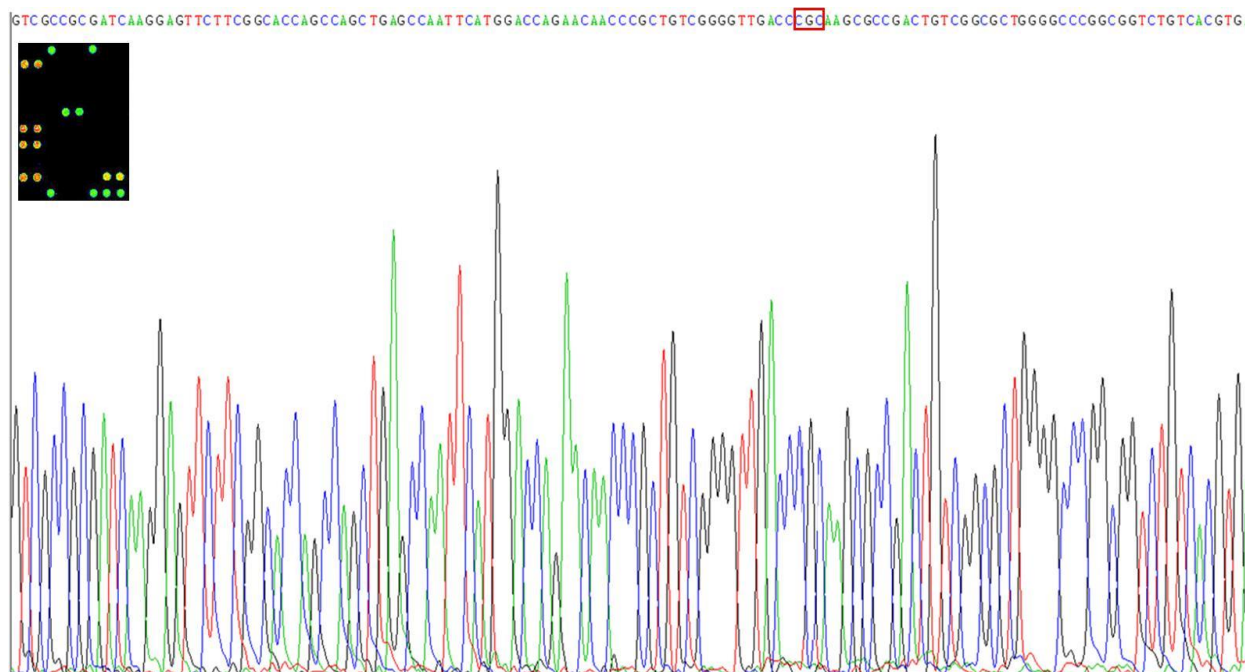

**Figure S9:** Spectra of sequencing analysis embedded with the fluorescence image for Sample 3

**Sample 4: 516 (GAC→GTC)**

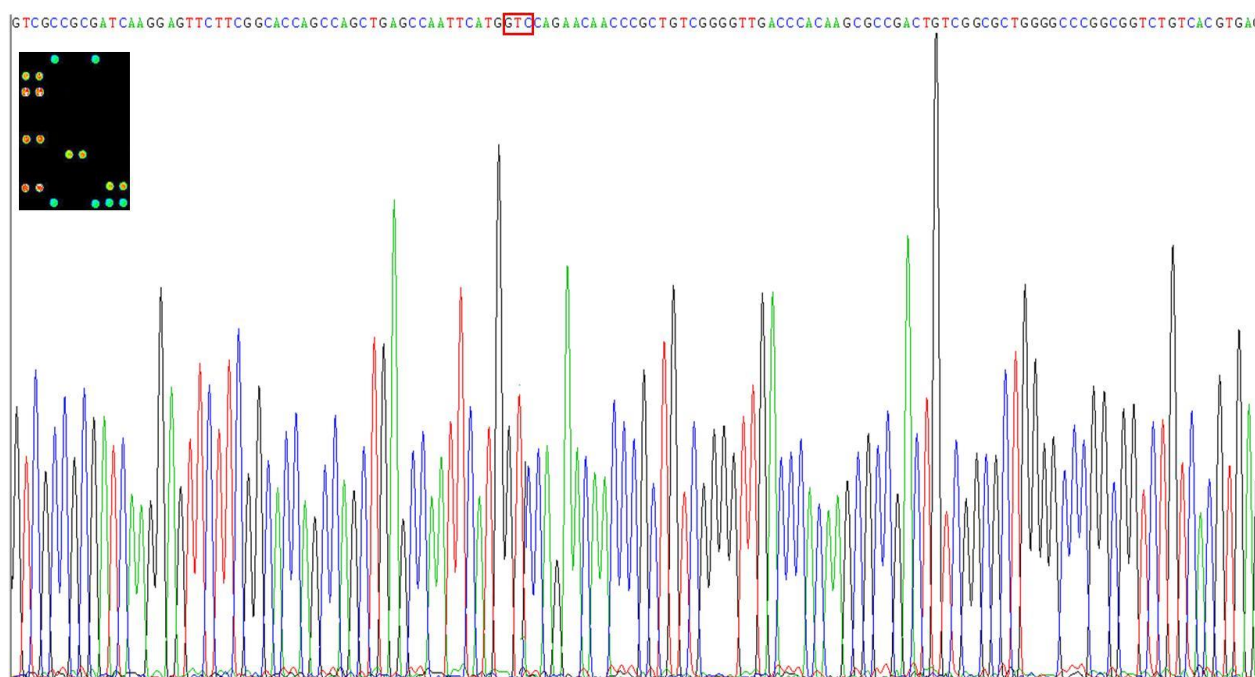

**Figure S10:** Spectra of sequencing analysis embedded with the fluorescence image for Sample 4

## Sample 5: Susceptible

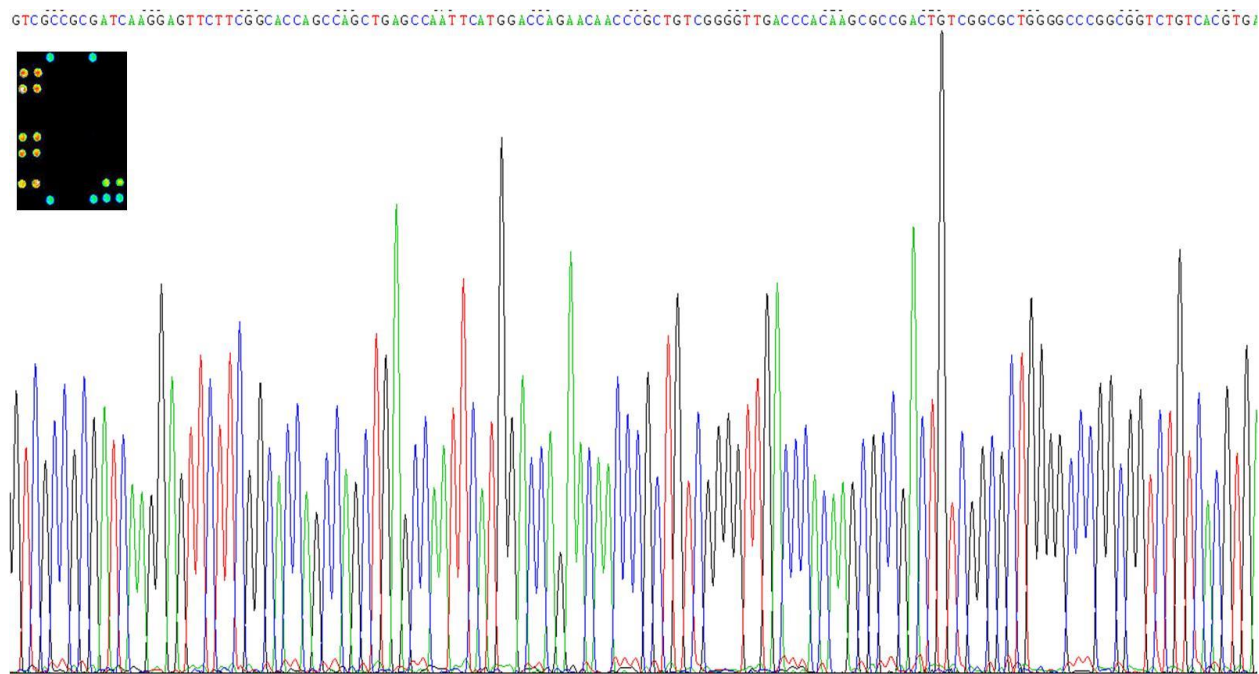

**Figure S11:** Spectra of sequencing analysis embedded with the fluorescence image for Sample 5

## Sample 6: 526 (CAC→TGC)

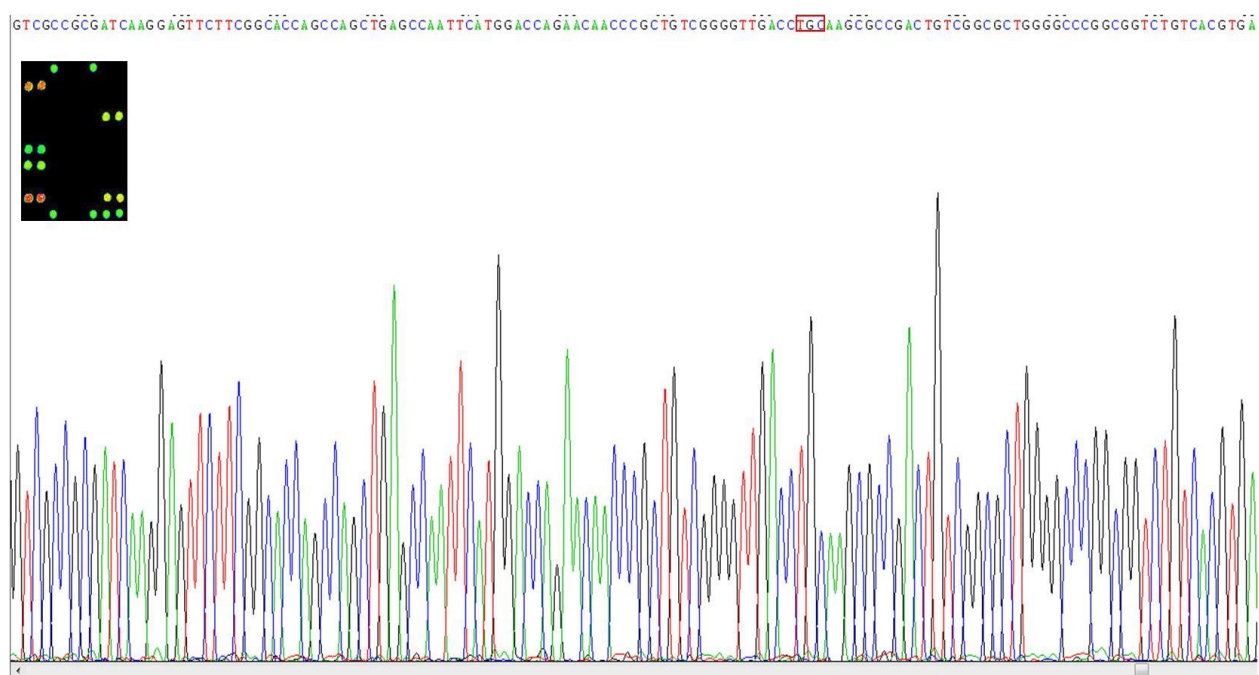

**Figure S12:** Spectra of sequencing analysis embedded with the fluorescence image for Sample 6

### Sample 7: 526 (CAC→TAC)

GTGCGCGCATCAAGGAGTTCTTCGGCACAGCCAGCTGAGCCATTTCATGGACCAAGAACAAACCCGCTGTCGGGGTTGACCTACAAAGCGCCGACTGTTCGGCGCTGGGGCCCGGGGCTCTGTCACTGA

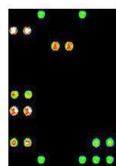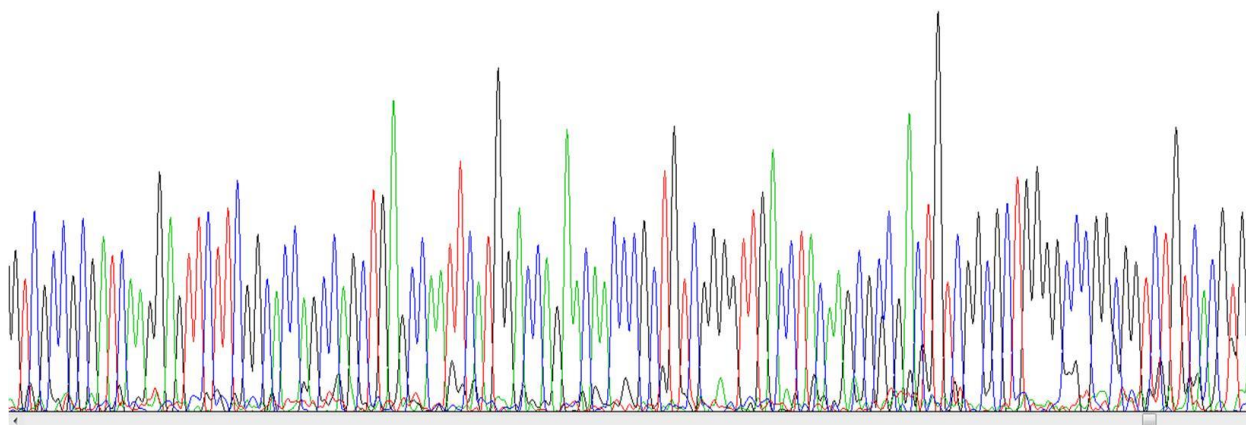

**Figure S13:** Spectra of sequencing analysis embedded with the fluorescence image for Sample 7

### Sample 8: 526(CAC→AAC)

GTGCGCGCATCAAGGAGTTCTTCGGCACAGCCAGCTGAGCCATTTCATGGACCAAGAACAAACCCGCTGTCGGGGTTGACCTAACAAAGCGCCGACTGTTCGGCGCTGGGGCCCGGGGCTCTGTCACTGA

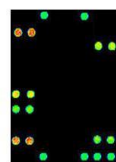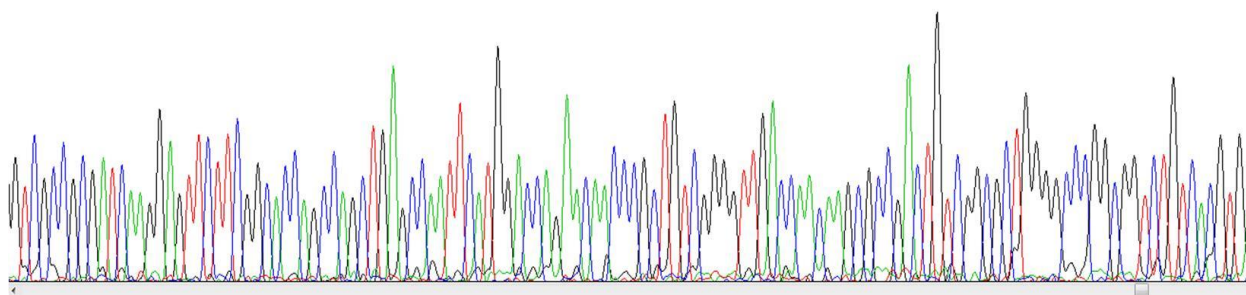

**Figure S14:** Spectra of sequencing analysis embedded with the fluorescence image for Sample 8

### Sample 9: 526 (CAC→GAC)

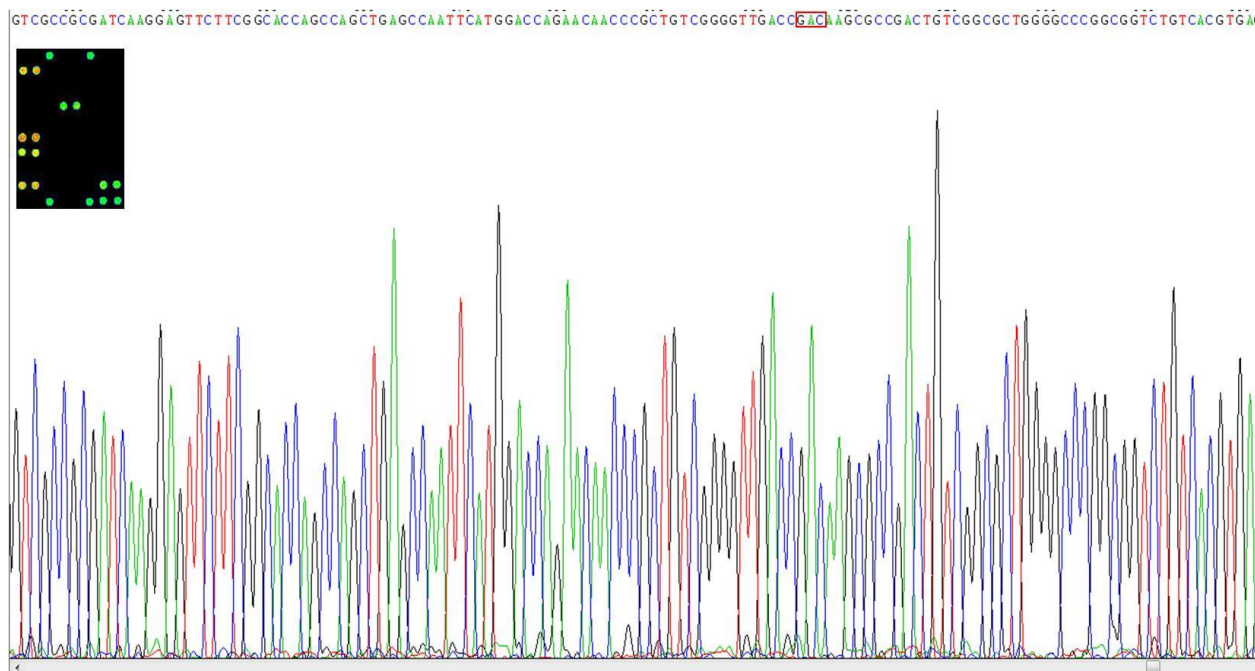

**Figure S15:** Spectra of sequencing analysis embedded with the fluorescence image for Sample 9

### Sample 10: Susceptible

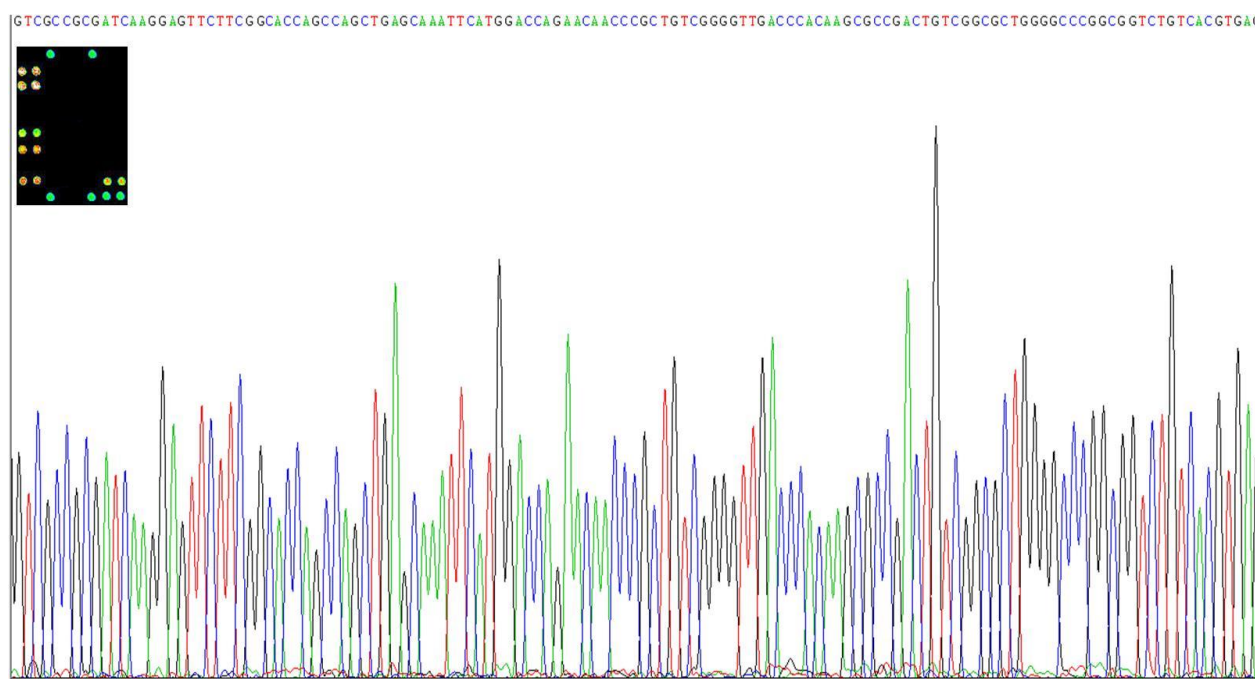

**Figure S16:** Spectra of sequencing analysis embedded with the fluorescence image for Sample 10

### Sample 11: 526 (CAC→CTC)

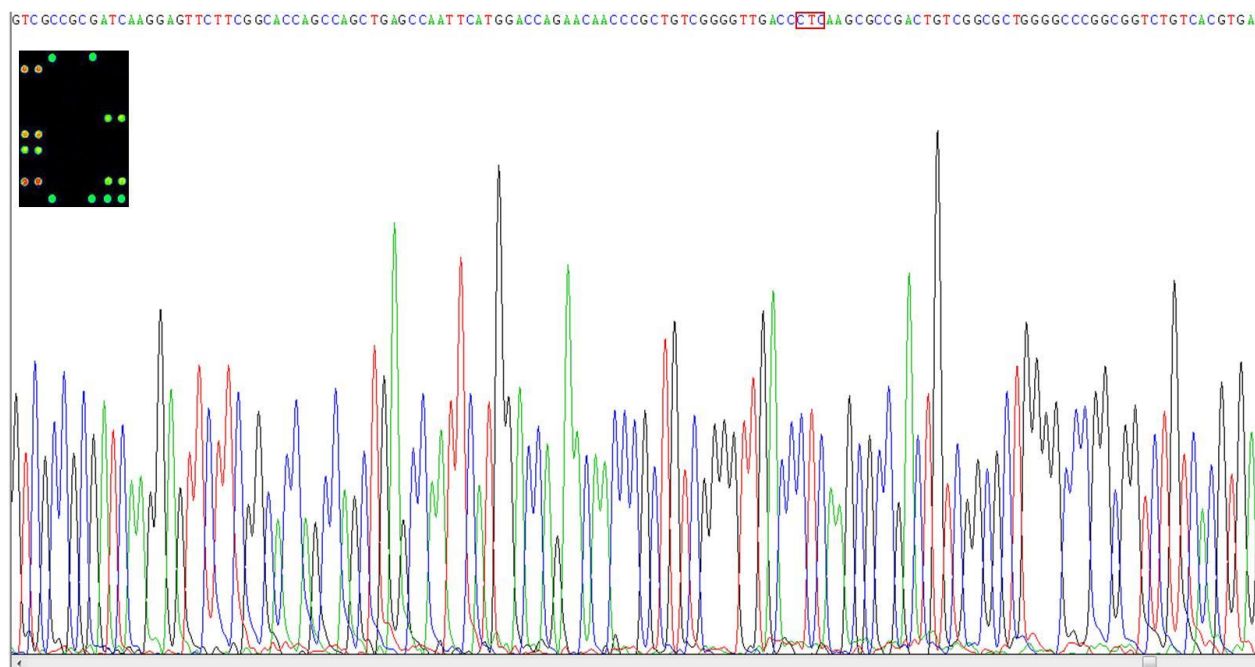

**Figure S17:** Spectra of sequencing analysis embedded with the fluorescence image for Sample 11

### Sample 12: 516 (CAC→TAC)

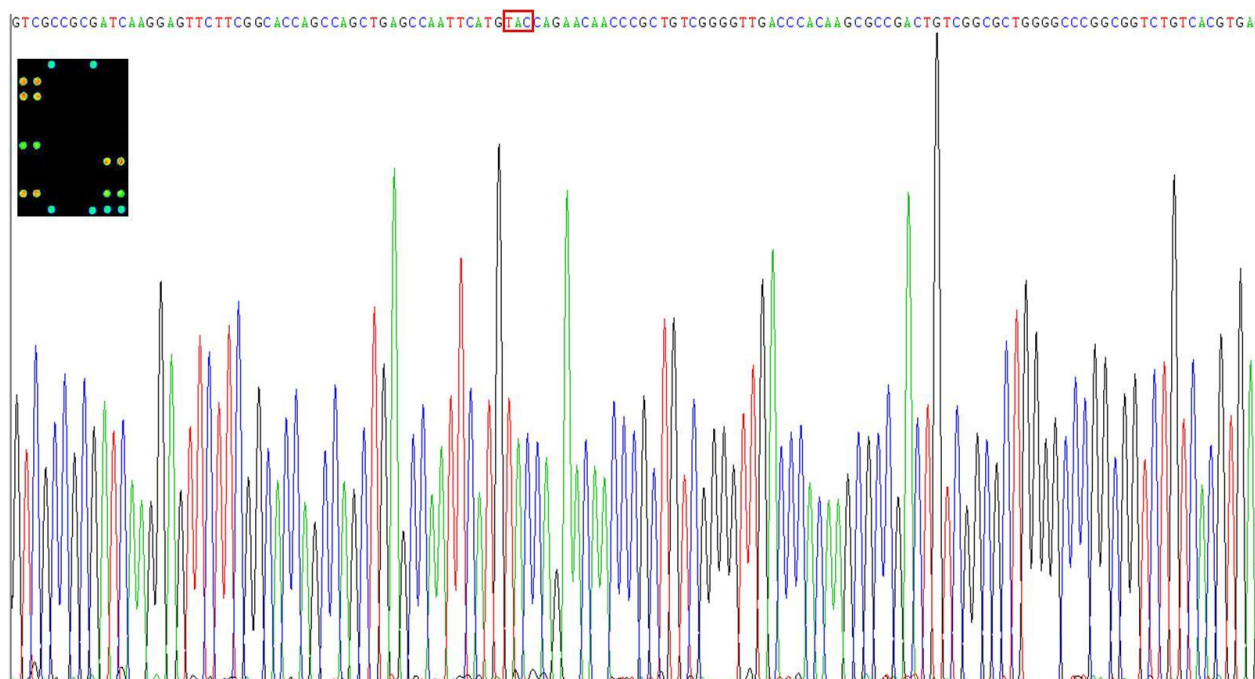

**Figure S18:** Spectra of sequencing analysis embedded with the fluorescence image for Sample 12

**Sample 13: 516 (GAC→TAC)**

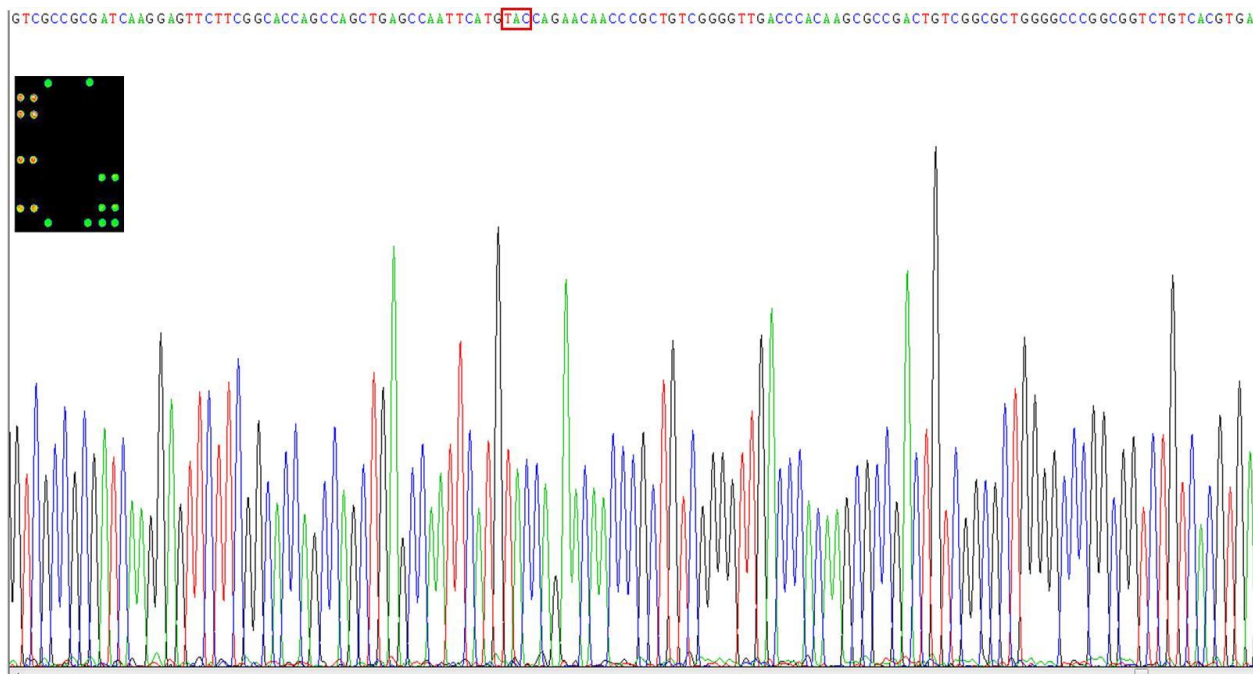

**Figure S19:** Spectra of sequencing analysis embedded with the fluorescence image for Sample 13

**Sample 14: 516 (GAC→TAC)**

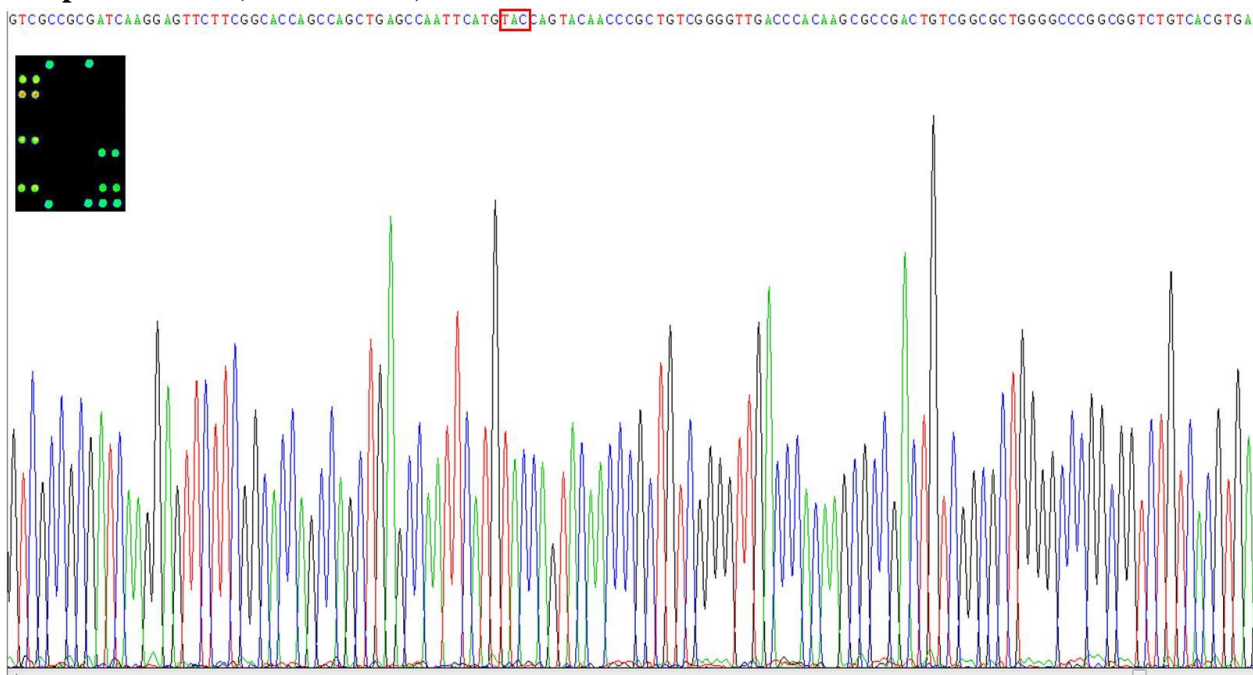

**Figure S20:** Spectra of sequencing analysis embedded with the fluorescence image for Sample 14

**Sample 15: 516 (GAC→TTC)**

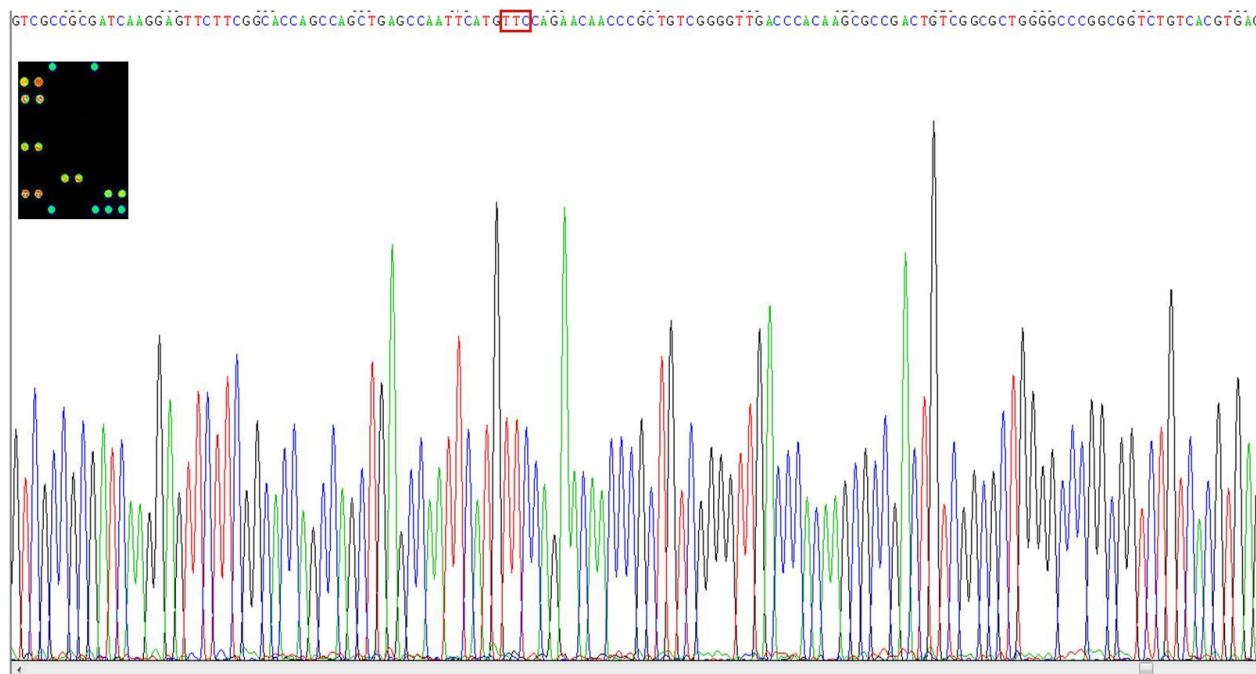

**Figure S21:** Spectra of sequencing analysis embedded with the fluorescence image for Sample 15

**Sample 16: 511(CTG→CCG) 516(GAC→GGC)**

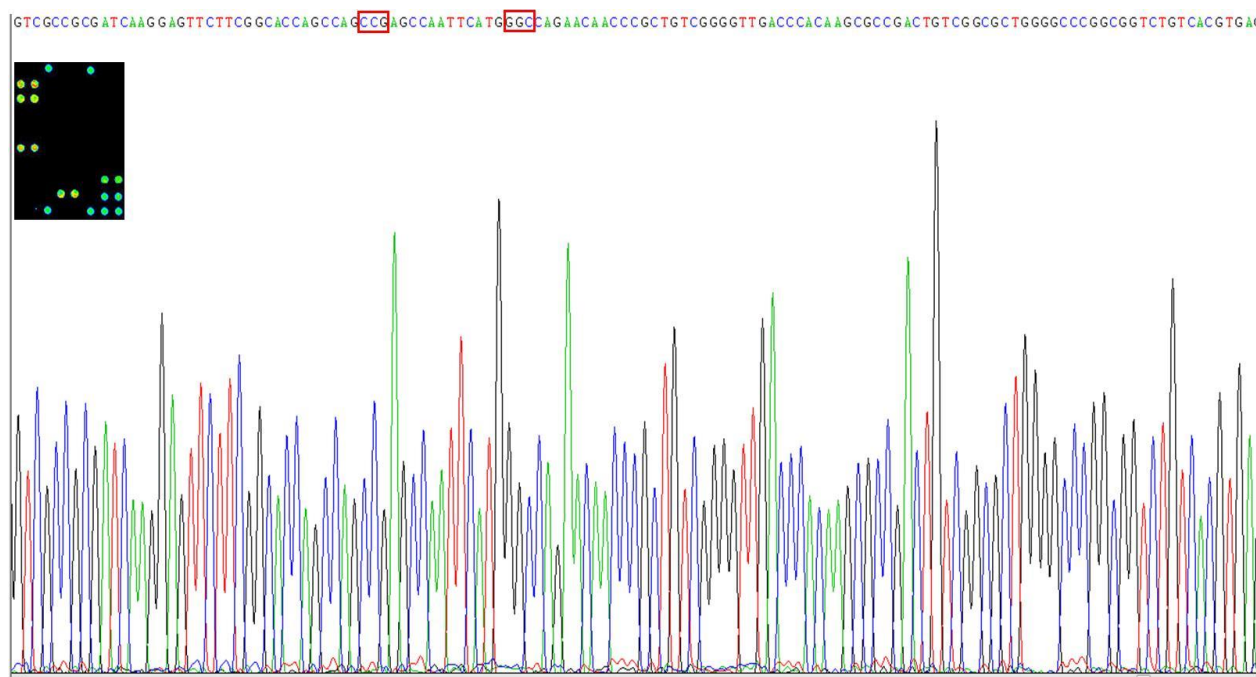

**Figure S22:** Spectra of sequencing analysis embedded with the fluorescence image for Sample 16

**Sample 17: 516 (GAC→GGC)**

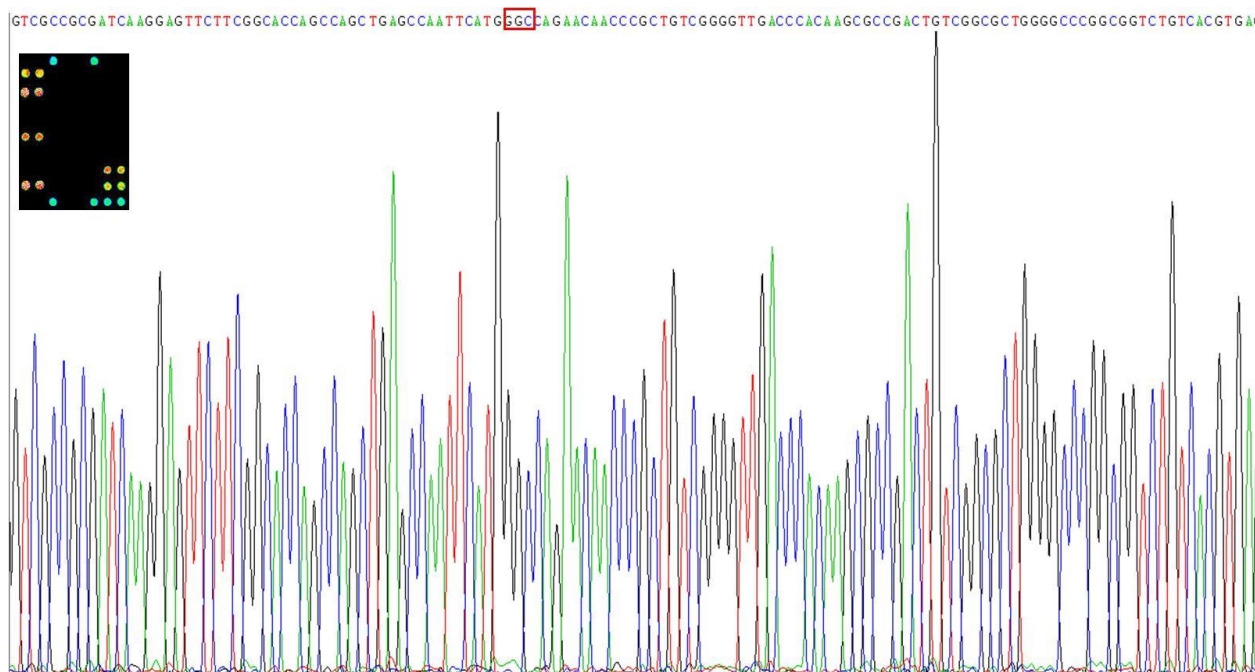

**Figure S23:** Spectra of sequencing analysis embedded with the fluorescence image for Sample 17

**Sample 18: 531(TCG→TGG)**

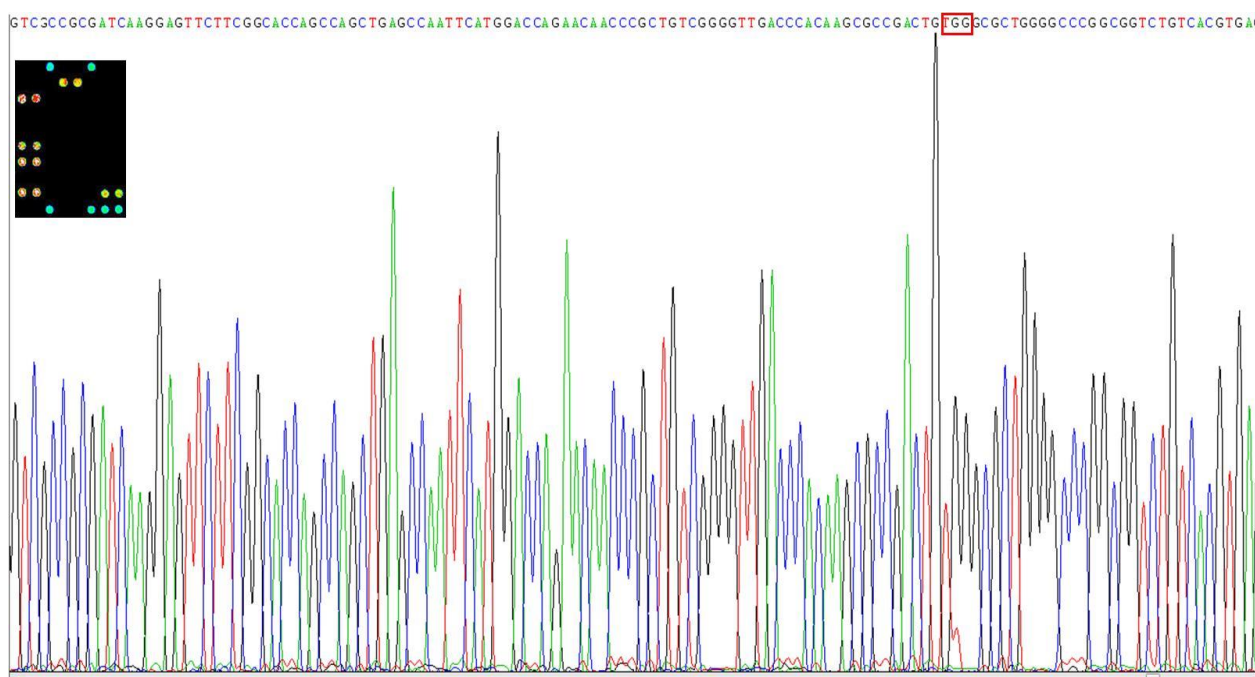

**Figure S24:** Spectra of sequencing analysis embedded with the fluorescence image for Sample 18

**Sample 19 : 511(CTG→CCG) 526(CAC→CAA)**

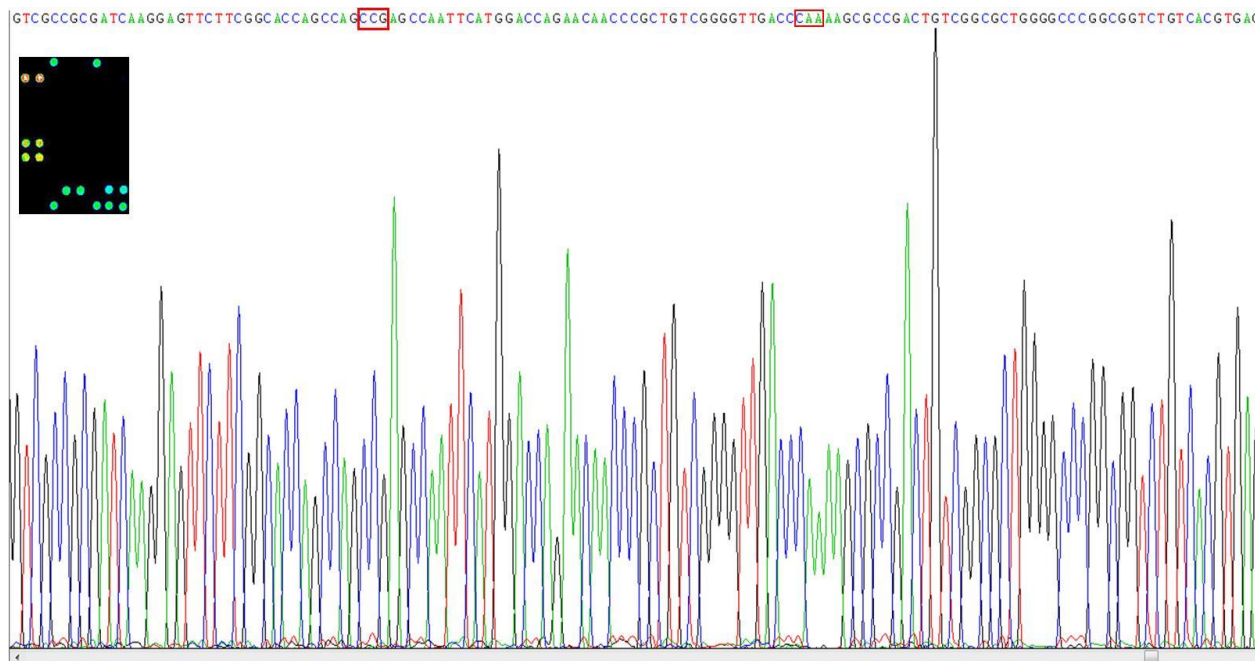

**Figure S25:** Spectra of sequencing analysis embedded with the fluorescence image for Sample 19

**Sample 20: 522 (TCG→CAG)**

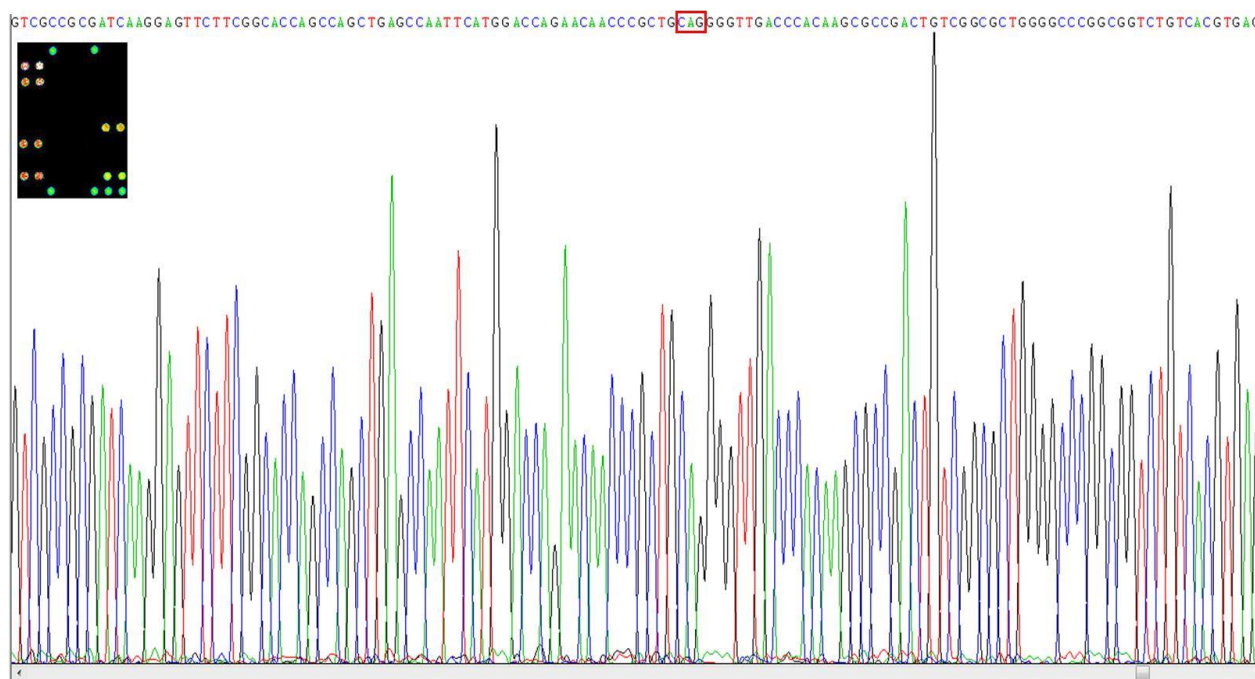

**Figure S26:** Spectra of sequencing analysis embedded with the fluorescence image for Sample 20

**Sample 21: 511(CTG→CCG)**

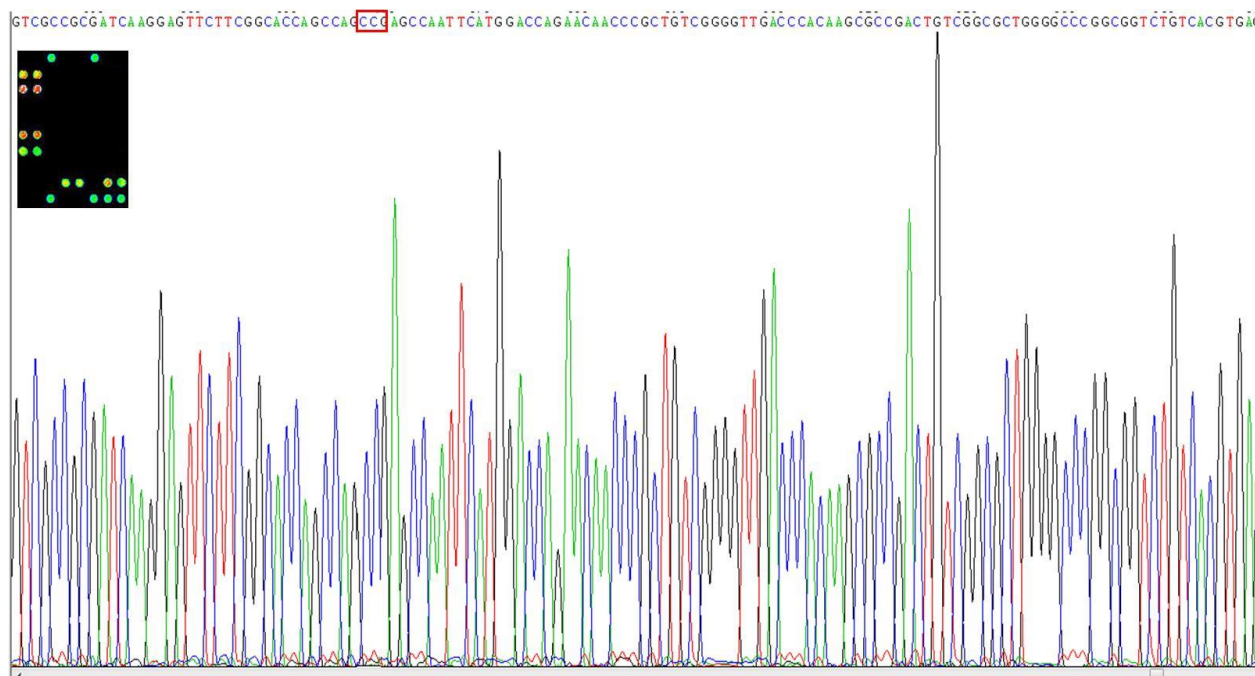

**Figure S27:** Spectra of sequencing analysis embedded with the fluorescence image for Sample 21

**Sample 22: Susceptible**

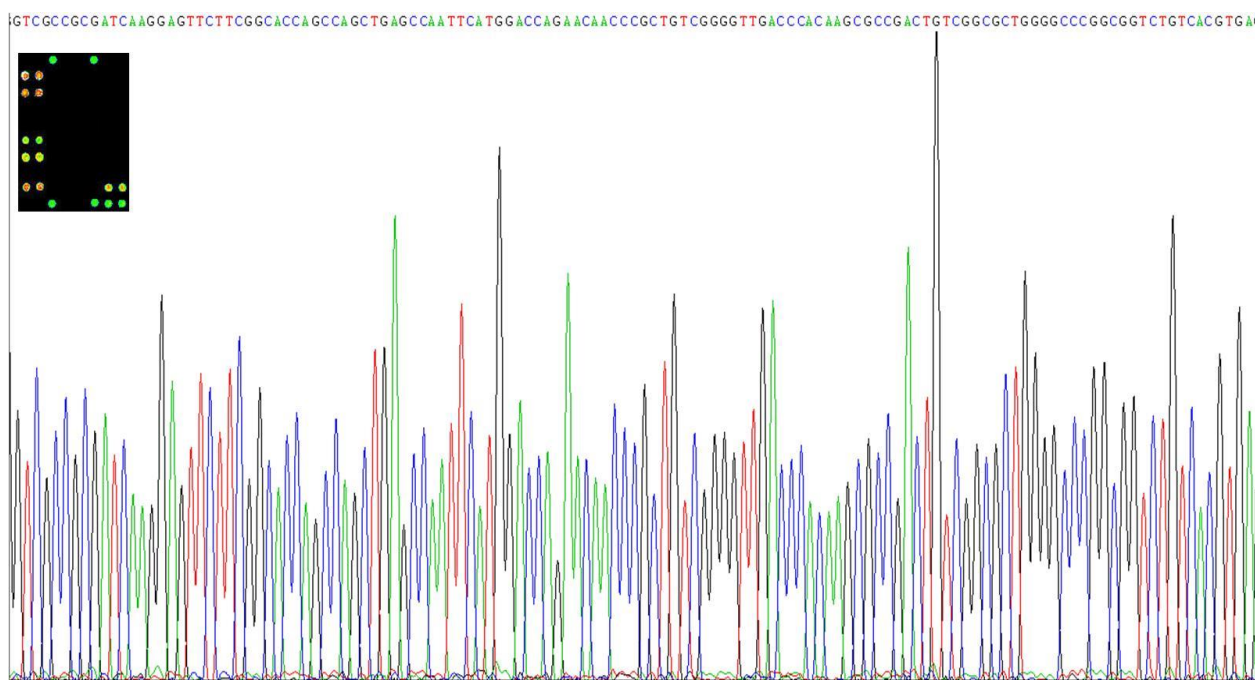

**Figure S28:** Spectra of sequencing analysis embedded with the fluorescence image for Sample 22

### Sample 23: Susceptible

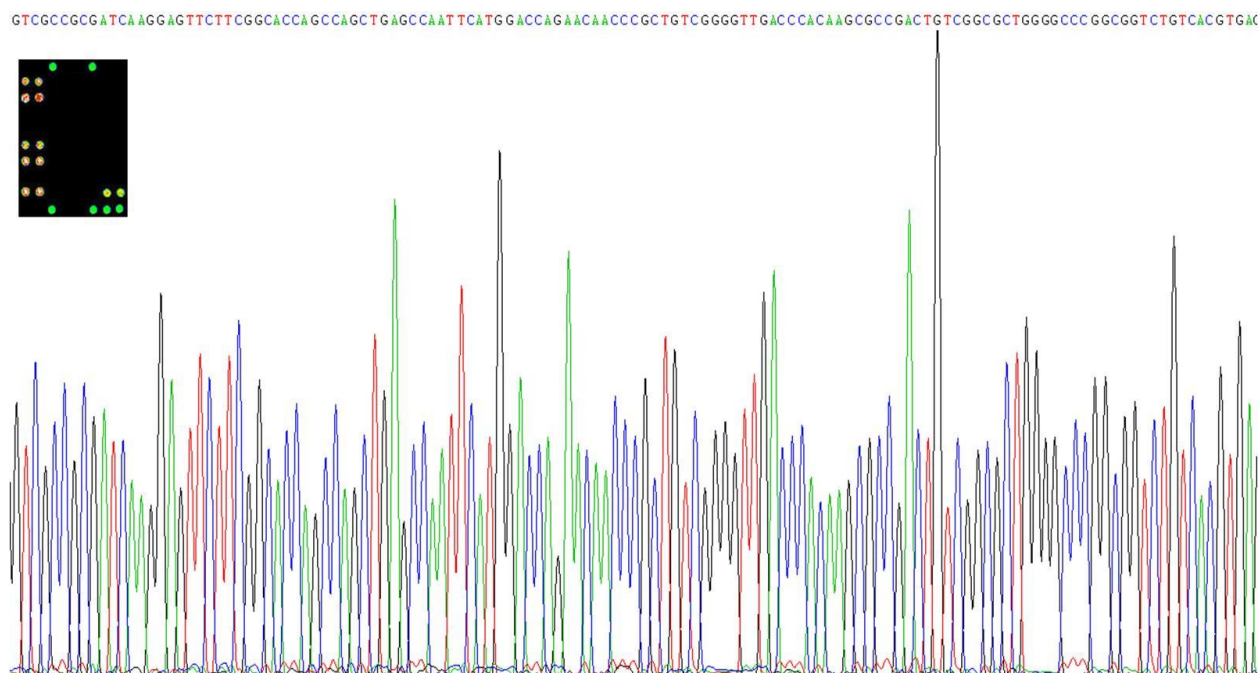

**Figure S29:** Spectra of sequencing analysis embedded with the fluorescence image for Sample 23

### Sample 24: Susceptible

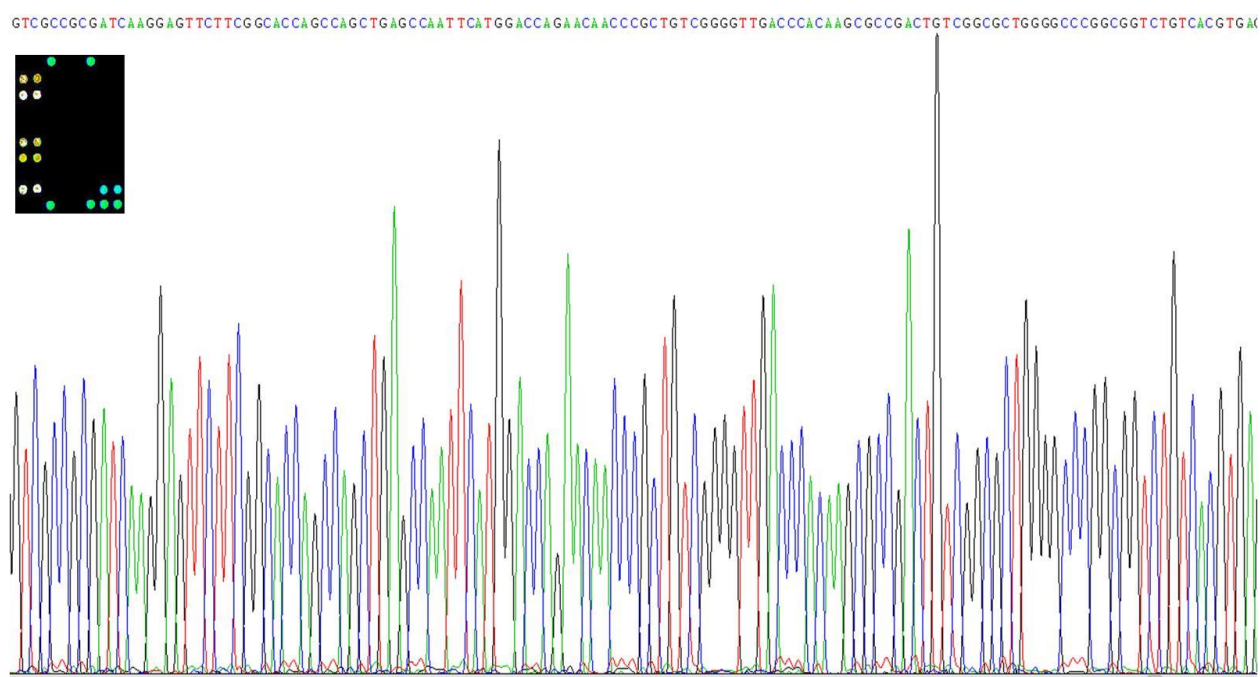

**Figure S30:** Spectra of sequencing analysis embedded with the fluorescence image for Sample 24

## 11. References:

---

1. J. Wang, L. Lee, C. Chou, C. Huang, S. Wang, H. Lai, P. Hsueh, K. Luh, *J. Clin. Microbiol.* 2004, 4599 - 4603.
2. a) K. Song, S. B. Nimse, J. Kim, J. Kim, Van-Thuan Nguyen, V. Ta, T. Kim, *Chem. Commun.* 2011, **47**, 7101; b) Van-Thuan Nguyen, S. B. Nimse, K. Song, J. Kim, J. Kim, V. Ta, T. Kim, *Chem. Commun.* 2012, **48**, 4582-4584
- 3 S. K. Poddar, *Mol. Cell. Probes* 2000, **14**, 25–32; L. Zhu, et. al., *Antimicrob. Agents Chemoth.* 2007, **51**, 3707–3713.
